# Supplementary material for: Conservative production of galactosaminogalactan in Metarhizium is responsible for appressorium mucilage production and topical infection of insect hosts
Source: PubMed Central journal article supplement (PMC8224951; doi:10.1371/journal.ppat.1009656), 2021-06-14
Supplement: ppat.1009656.s010.pdf [file ppat.1009656.s010.pdf]

**S1 Table. Presence of the conserved GAG biosynthetic gene cluster in different fungi.**

| <b>Fungal species</b>           | <b>GAG biosynthetic gene cluster</b> |                                    |                                     |                                    |                                    |
|---------------------------------|--------------------------------------|------------------------------------|-------------------------------------|------------------------------------|------------------------------------|
| <i>A. fumigatus</i>             | Afu3g07870<br>( <i>agd3</i> )        | Afu3g07890<br>( <i>ega3</i> )      | Afu3g07900<br>( <i>sph3</i> )       | Afu3g07910<br>( <i>uge3</i> )      | Afu3g07860<br>( <i>gtb3</i> )      |
| <i>A. nidulans</i>              | AN2954                               | AN2953                             | AN2952                              | AN2951                             | AN2955                             |
| <i>M. robertsii</i>             | MAA_06941<br>( <i>MrAgd</i> ; 48%*)  | MAA_06942<br>( <i>MrEga</i> ; 47%) | MAA_06943<br>( <i>MrSph</i> ; 34% ) | MAA_06944<br>( <i>MrUge</i> ; 51%) | MAA_06945<br>( <i>MrGtb</i> ; 28%) |
| <i>M. anisopliae</i>            | MAN_07185                            | MAN_07186                          | MAN_07187                           | MAN_07188                          | MAN_07189                          |
| <i>M. brentum</i>               | MBR_09142                            | MBR_09141                          | MBR_09140                           | MBR_09139                          | MBR_09138                          |
| <i>M. guizhouense</i>           | MGU_09803                            | MGU_09802                          | MGU_09801                           | MGU_09800                          | MGU_09799                          |
| <i>M. majus</i>                 | MAJ_08446                            | MAJ_08447                          | MAJ_08448                           | MAJ_08449                          | MAJ_08450                          |
| <i>M. rileyi</i>                | NOR_03856                            | NOR_03857                          | NOR_03858                           | NOR_03859                          | NOR_03860                          |
| <i>M. acridum</i>               | MAC_02143                            | MAC_02142                          | MAC_02141                           | MAC_02140                          | MAC_02139                          |
| <i>M. album</i>                 | MAM_08305                            | MAM_08304                          | MAM_08303                           | MAM_08302                          | MAM_08301                          |
| <i>Neurospora crassa</i>        | NCU05137                             | NCU05136                           | NCU05135                            | NCU05133                           | NCU05132                           |
| <i>Neurospora tetrasperma</i>   | XP_009854704                         | XP_009854705                       | XP_009854706                        | XP_009854708                       | XP_009854709                       |
| <i>Verticillium dahliae</i>     | VDAG_08037                           | VDAG_08038                         | VDAG_08039                          | VDAG_08040                         | VDAG_08041                         |
| <i>Sclerotinia sclerotiorum</i> | SS1G_04473                           | SS1G_04475                         | SS1G_04476                          | SS1G_04477                         | SS1G_04472                         |
| <i>Botrytis cinerea</i>         | BC1G_00448                           | BC1G_00447                         | BC1G_00446                          | BC1G_00445                         | BC1G_00451                         |
| <i>Arthrobotrys oligospora</i>  | XP_011120260                         | XP_011123749                       | XP_011119552                        | XP_011117653                       | XP_011119554                       |

\*, identities are at the amino acid level to the corresponding homologue of *A. fumigatus*.
