# Supplementary material for: Conservative production of galactosaminogalactan in Metarhizium is responsible for appressorium mucilage production and topical infection of insect hosts
Source: PubMed Central journal article supplement (PMC8224951; doi:10.1371/journal.ppat.1009656), 2021-06-14
Supplement: ppat.1009656.s011.pdf [file ppat.1009656.s011.pdf]

**S2 Table. Estimation and comparison the median lethal time (LT<sub>50</sub>, hours) between WT and different mutants during topical infection of the wax moth larvae.**

| <b>Strains</b> | <b>LT<sub>50</sub></b> | <b><math>\chi^2</math>*</b> | <b><i>P</i></b> |
|----------------|------------------------|-----------------------------|-----------------|
| WT             | 84 ± 4.19              | –                           | –               |
| <i>ΔMrGAG</i>  | 108 ± 6.57             | 7.621                       | 0.006           |
| <i>ΔMrAgd</i>  | 132 ± 7.77             | 28.528                      | 0               |
| <i>ΔMrEga</i>  | 108 ± 6.08             | 9.52                        | 0.002           |
| <i>ΔMrSph</i>  | 96 ± 5.83              | 6.263                       | 0.012           |
| <i>ΔMrUge</i>  | 108 ± 9.68             | 6.775                       | 0.009           |
| <i>ΔMrGtb</i>  | 108 ± 8.06             | 6.139                       | 0.013           |

\*, Log-rank test of the survival difference between WT and *ΔMrGAG*.
