# Supplementary material for: Conservative production of galactosaminogalactan in Metarhizium is responsible for appressorium mucilage production and topical infection of insect hosts
Source: PubMed Central journal article supplement (PMC8224951; doi:10.1371/journal.ppat.1009656), 2021-06-14
Supplement: ppat.1009656.s013.pdf [file ppat.1009656.s013.pdf]

**S4 Table. Verification and comparison of the selected protein expressions detected by PRM and iTRAQ analyses.**

| <b>Protein name</b> | <b>Protein annotation</b>                  | <b>PRM Ratio<br/>(MrGAG/WT)</b> | <b>iTRAQ ratio<br/>(MrGAG/WT)</b> |
|---------------------|--------------------------------------------|---------------------------------|-----------------------------------|
| MAA_09630           | glycosyl hydrolase family 27               | 0.80                            | 0.770                             |
| MAA_08563           | Aminopeptidase                             | 1.93                            | 1.256                             |
| MAA_07696           | Carboxypeptidase                           | 0.95                            | 0.846                             |
| MAA_05630           | Cell wall galactomannoprotein Mp2          | 1.22                            | 0.905                             |
| MAA_07347           | Glutathione S-transferase                  | 1.25                            | 1.148                             |
| MAA_06565           | Glutathione S-transferase/chloride channel | 2.18                            | 1.258                             |
| MAA_06336           | Glycoside hydrolase family 61              | 1.32                            | 1.247                             |
| MAA_01100           | Heat shock protein                         | 1.64                            | 1.091                             |
| MAA_08921           | Lipase 2                                   | 1.06                            | 0.911                             |
| MAA_06941           | MrAgd, Extracellular serine-rich protein   | 0                               | 0.389                             |
| MAA_06934           | Peptidase family T4 protein                | 1.67                            | 1.215                             |
| MAA_05820           | Peptidase M24, structural domain protein   | 1.75                            | 1.206                             |
| MAA_03262           | Peptidase S1/S6, chymotrypsin/Hap          | 0.86                            | 0.717                             |
| MAA_09372           | Peptidase S28                              | 1.77                            | 1.248                             |
| MAA_08819           | Perilipin-like protein, Mpl1               | 1.78                            | 1.177                             |
| MAA_00492           | Subtilisin-like protease                   | 1.81                            | 1.105                             |
| MAA_09454           | Thioredoxin-like fold protein              | 1.45                            | 1.036                             |
