# Supplementary material for: Conservative production of galactosaminogalactan in Metarhizium is responsible for appressorium mucilage production and topical infection of insect hosts
Source: PubMed Central journal article supplement (PMC8224951; doi:10.1371/journal.ppat.1009656), 2021-06-14
Supplement: ppat.1009656.s014.pdf [file ppat.1009656.s014.pdf]

**S5 Table. PCR primers used in this study.**

| <b>Primer</b>       | <b>Sequence</b>                           | <b>RE*</b> | <b>Application</b> |
|---------------------|-------------------------------------------|------------|--------------------|
| <b><i>MrSph</i></b> |                                           |            |                    |
| KO UF               | AGCTTGATATCGAATTCACGACTGACATCTTTAGCT      | EcoR I     | Gene deletion      |
| KO UR               | ATCATCTTCTGTGCGACCATCTACGTGACGGACGAG      |            |                    |
| KO DF               | GTCACCGAGATCTGATGAGTTGACAATGGCGACGAAC     | Sac I      | Gene rescue        |
| KO DR               | GGAACAAAAGCTGGAGCTCCAGGAATAGGTAGTAGTAC    |            |                    |
| TF                  | TCGTCCGTCACGTAGATG                        |            | PCR verification   |
| TR                  | GTTTCGTCGCCATCGTCAAC                      |            |                    |
| Sph-RE.F            | GAGATCTGATGAACTAGTCGTCGTTTGGCAGCCTGCAG    |            | Gene rescue        |
| Sph-RE.R            | GAACAAAAGCTGGAGCTCTCAACTTTCCGAGCACTC      |            |                    |
| RT-F                | TCTTTGAGCAGTCGCATC                        |            | RT-PCR             |
| RT-R                | GTTAGCTCGGTCCACAC                         |            |                    |
| <b><i>MrAgd</i></b> |                                           |            |                    |
| KO UF               | CAGCCCGGGGGATCCGACCAGACGAAATCTACAG        | BamH I     | Gene deletion      |
| KO UR               | CAATATCATCTTCTGTGCGACGATCCTACCTGGTCTCAGTC |            |                    |
| KO DF               | CACCGAGATCTGATGACATATGCAACATTGGAGATG      | Spe I      | PCR verification   |
| KO DR               | CCGCTCTAGAACTAGTGTGAAGCTTGACAAACGAC       |            |                    |
| TF                  | GTAGTAGTAGCAATGCCTC                       |            | PCR verification   |
| TR                  | CTCGACGGCTATGGCATAAC                      |            |                    |
| Agd-RE.F            | GCAGCCCGGGGGATCCCTACAGCTTGACCGGCGT        |            | Gene rescue        |
| Agd-RE.R            | GCACGTCGACGGATCCGTTGTGCTTTTGGCTAGTC       |            |                    |
| RT-F                | CGTCGTCATCTCCAATGT                        |            | RT-PCR             |
| RT-R                | CACGATGGTGCCAAATTC                        |            |                    |
| <b><i>MrEga</i></b> |                                           |            |                    |
| KO UF               | CTGCAGCCCGGGGGATCCGTGCCATTATTATCATATGC    | BamH I     | Gene deletion      |
| KO UR               | CAATATCATCTTCTGTGCGACGAAGTAGCAAATGACGCTG  |            |                    |
| KO DF               | CACCGAGATCTGATGAGACAACCTTTAGCACCGTC       | Spe I      | PCR verification   |
| KO DR               | CGCTCTAGAACTAGTCATCTTCTTCGACGAGATG        |            |                    |
| TF                  | CACGACGTGGCAAATCATC                       |            | PCR verification   |
| TR                  | GTTTGTGGCTTGTTCAG                         |            |                    |
| Ega-RE.F            | GCAGCCCGGGGGATCCTCGGTATTGCTTCCGCAAC       |            | Gene rescue        |
| Ega-RE.R            | GCACGTCGACGGATCCTCAGCTAAAGATGTCAGTCG      |            |                    |
| RT-F                | CCGAACCTCCATCTACAAG                       |            | RT-PCR             |
| RT-R                | GCGCTGAAGTAGCAAATG                        |            |                    |
| <b><i>MrUge</i></b> |                                           |            |                    |
| KO UF               | CAGCCCGGGGGATCCGTTGACAATGGCGACGAAC        | BamH I     | Gene deletion      |
| KO UR               | ATCATCTTCTGTGCGACCATCACGCAGGTGCTCAC       |            |                    |
| KO DF               | CACCGAGATCTGATGACTTGAAGCTGTTGCTGAG        | Spe I      | PCR verification   |
| KO DR               | CGCTCTAGAACTAGTGTGATTGTAGAAACAGAC         |            |                    |
| TF                  | CTTGGATACGAAGTTCCAC                       |            | PCR verification   |
| TR                  | CTCAGCAACAGCTTCAAG                        |            |                    |
| RT-F                | CCTTGTCATCCAGAAT                          |            | RT-PCR             |
| RT-R                | CATACAACGCTTGAGCTTC                       |            |                    |
| <b><i>MrGtb</i></b> |                                           |            |                    |
| KO UF               | CTGCAGCCCGGGGGATCCGTGATGTTTGGAGTCGACCAG   | BamH I     | Gene deletion      |
| KO UR               | ATCATCTTCTGTGCGACGACGCCGAAAAGTACGAG       |            |                    |
| KO DF               | CACCGAGATCTGATGACTTTGAGTTTGGCACCATG       | Spe I      | Gene rescue        |
| KO DR               | GCTCTAGAACTAGTCAGTACTTTTGCAGCGTC          |            |                    |

|                     |                                           |              |
|---------------------|-------------------------------------------|--------------|
| TF                  | CTCGTACTTTTTCGGCGTC                       | PCR          |
| TR                  | GTCCGTCGACTCAATGTAG                       | verification |
| RT-F                | CTCATCCTGTTTGGCATTAC                      |              |
| RT-R                | GCCACGACATCAGAGTATAG                      | RT-PCR       |
| <b><i>MrGAG</i></b> |                                           |              |
| KOUF                | GATAAGCTTGATATCGAATTCCTGCAAGTCGTAAAAGGCAG |              |
| KOUR                | GTTGGCACGTCGACGGATCCCTCGACGGCTATGGCATAAC  | Gene         |
| KODF                | CACGTCGACTAGTTCTAGAGAATGGTATCAACAAGCGAC   | deletion     |
| KODR                | GGTGGCGGCCGCTCTAGAGTACCGGTCGTATATGATG     |              |
| TF                  | CAAGTAGCTTTGGCGCTTG                       | PCR          |
| TR                  | CTAGCGCAGAATTTGGTGAG                      | verification |

\*RE, restriction enzyme.
